# Supplementary material for: Application of Eye Tracking Technology in Medicine: A Bibliometric Analysis
Source: MDPI journal article supplement (doi:10.3390/vision5040056), 2021-11-11
Supplement: s1 [file s1]

**Table S1.** World collaboration network for articles investigating the use of eye tracking in different medical fields

| <b>From</b> | <b>To</b>            | <b>Frequency</b> |
|-------------|----------------------|------------------|
| Argentina   | Colombia             | 1                |
| Australia   | Argentina            | 1                |
| Australia   | Brazil               | 1                |
| Australia   | Canada               | 6                |
| Australia   | Chile                | 1                |
| Australia   | Colombia             | 1                |
| Australia   | Italy                | 6                |
| Australia   | Mexico               | 1                |
| Australia   | Portugal             | 1                |
| Australia   | Qatar                | 1                |
| Australia   | Spain                | 3                |
| Australia   | Sweden               | 17               |
| Austria     | Russia               | 1                |
| Belgium     | Canada               | 2                |
| Belgium     | France               | 6                |
| Belgium     | Luxembourg           | 2                |
| Belgium     | Netherlands          | 2                |
| Belgium     | Poland               | 1                |
| Belgium     | Spain                | 5                |
| Belgium     | Switzerland          | 3                |
| Belgium     | UK                   | 3                |
| Belgium     | USA                  | 10               |
| Brazil      | Hungary              | 1                |
| Canada      | Austria              | 2                |
| Canada      | Brazil               | 1                |
| Canada      | Chile                | 1                |
| Canada      | Cyprus               | 1                |
| Canada      | Denmark              | 1                |
| Canada      | Mexico               | 1                |
| Canada      | Russia               | 1                |
| Canada      | Sweden               | 2                |
| Canada      | United Arab Emirates | 1                |
| Chile       | Argentina            | 1                |
| Chile       | Colombia             | 1                |
| China       | Australia            | 7                |
| China       | Austria              | 1                |
| China       | Canada               | 8                |
| China       | France               | 2                |
| China       | Ireland              | 1                |
| China       | Japan                | 6                |
| China       | New Zealand          | 1                |
| China       | Singapore            | 1                |
| China       | Spain                | 3                |
| China       | Sweden               | 1                |
| China       | UK                   | 4                |

|         |              |    |
|---------|--------------|----|
| Denmark | Uruguay      | 1  |
| Finland | Canada       | 1  |
| Finland | Denmark      | 1  |
| Finland | Ireland      | 1  |
| Finland | Malawi       | 2  |
| Finland | Russia       | 1  |
| Finland | South africa | 2  |
| France  | Brazil       | 1  |
| France  | Canada       | 5  |
| France  | Cyprus       | 1  |
| France  | Italy        | 3  |
| France  | Luxembourg   | 1  |
| France  | Malaysia     | 2  |
| France  | Mexico       | 1  |
| France  | Sweden       | 8  |
| France  | Switzerland  | 14 |
| France  | Tunisia      | 1  |
| Germany | Australia    | 8  |
| Germany | Austria      | 9  |
| Germany | Canada       | 6  |
| Germany | China        | 3  |
| Germany | Cyprus       | 1  |
| Germany | Finland      | 1  |
| Germany | France       | 3  |
| Germany | Greece       | 1  |
| Germany | Israel       | 1  |
| Germany | Italy        | 11 |
| Germany | Japan        | 1  |
| Germany | Korea        | 2  |
| Germany | Poland       | 3  |
| Germany | Russia       | 1  |
| Germany | Slovakia     | 1  |
| Germany | South africa | 2  |
| Germany | Spain        | 2  |
| Germany | Sweden       | 5  |
| Germany | Switzerland  | 17 |
| Germany | UK           | 25 |
| Greece  | Turkey       | 1  |
| India   | Brazil       | 1  |
| India   | Canada       | 1  |
| India   | France       | 1  |
| India   | Ireland      | 1  |
| India   | New Zealand  | 1  |
| Iran    | Canada       | 1  |
| Iran    | Sweden       | 2  |
| Israel  | Canada       | 1  |
| Israel  | France       | 1  |
| Israel  | New Zealand  | 1  |
| Italy   | Argentina    | 1  |

|             |              |    |
|-------------|--------------|----|
| Italy       | Austria      | 1  |
| Italy       | Brazil       | 1  |
| Italy       | Canada       | 2  |
| Italy       | Cyprus       | 1  |
| Italy       | Greece       | 1  |
| Italy       | Hungary      | 1  |
| Italy       | Iran         | 2  |
| Italy       | Ireland      | 1  |
| Italy       | Luxembourg   | 1  |
| Italy       | Norway       | 1  |
| Italy       | Portugal     | 2  |
| Italy       | Spain        | 6  |
| Italy       | Sweden       | 4  |
| Japan       | Austria      | 1  |
| Japan       | Bangladesh   | 1  |
| Japan       | France       | 1  |
| Japan       | Spain        | 1  |
| Korea       | Saudi Arabia | 1  |
| Luxembourg  | Argentina    | 2  |
| Luxembourg  | Brazil       | 1  |
| Luxembourg  | Canada       | 1  |
| Mexico      | Spain        | 1  |
| Netherlands | Australia    | 4  |
| Netherlands | Austria      | 2  |
| Netherlands | Canada       | 3  |
| Netherlands | China        | 1  |
| Netherlands | Cyprus       | 1  |
| Netherlands | Denmark      | 1  |
| Netherlands | France       | 1  |
| Netherlands | Germany      | 18 |
| Netherlands | India        | 1  |
| Netherlands | Italy        | 3  |
| Netherlands | Luxembourg   | 1  |
| Netherlands | Mexico       | 1  |
| Netherlands | Russia       | 3  |
| Netherlands | South africa | 4  |
| Netherlands | Spain        | 2  |
| Netherlands | Sweden       | 5  |
| Netherlands | Switzerland  | 4  |
| Netherlands | Turkey       | 1  |
| Netherlands | UK           | 23 |
| New Zealand | Austria      | 1  |
| New Zealand | Uruguay      | 1  |
| Poland      | Hungary      | 1  |
| Poland      | Morocco      | 1  |
| Portugal    | Brazil       | 1  |
| Portugal    | Colombia     | 1  |
| Portugal    | Sweden       | 3  |
| Qatar       | Bangladesh   | 1  |

|              |                      |    |
|--------------|----------------------|----|
| Qatar        | United Arab Emirates | 1  |
| Serbia       | Slovenia             | 2  |
| Singapore    | Spain                | 1  |
| South africa | Austria              | 1  |
| South africa | Canada               | 1  |
| South africa | Denmark              | 1  |
| South africa | Sweden               | 1  |
| Spain        | Austria              | 1  |
| Spain        | Chile                | 3  |
| Spain        | Norway               | 1  |
| Sweden       | Austria              | 2  |
| Sweden       | Cyprus               | 1  |
| Sweden       | Denmark              | 1  |
| Sweden       | New Zealand          | 1  |
| Sweden       | Norway               | 3  |
| Sweden       | Poland               | 2  |
| Sweden       | Russia               | 1  |
| Sweden       | Spain                | 1  |
| Switzerland  | Austria              | 1  |
| Switzerland  | Brazil               | 1  |
| Switzerland  | Canada               | 5  |
| Switzerland  | Cyprus               | 1  |
| Switzerland  | Greece               | 1  |
| Switzerland  | Italy                | 4  |
| Switzerland  | Malaysia             | 1  |
| Switzerland  | Spain                | 1  |
| Switzerland  | Sweden               | 5  |
| Switzerland  | Turkey               | 1  |
| Switzerland  | United Arab Emirates | 1  |
| UK           | Argentina            | 2  |
| UK           | Australia            | 18 |
| UK           | Austria              | 2  |
| UK           | Canada               | 7  |
| UK           | Chile                | 2  |
| UK           | Colombia             | 1  |
| UK           | Cyprus               | 1  |
| UK           | Denmark              | 1  |
| UK           | Finland              | 4  |
| UK           | France               | 3  |
| UK           | Georgia              | 1  |
| UK           | Greece               | 1  |
| UK           | Hungary              | 1  |
| UK           | India                | 3  |
| UK           | Iran                 | 2  |
| UK           | Ireland              | 6  |
| UK           | Israel               | 5  |
| UK           | Italy                | 14 |
| UK           | Japan                | 2  |
| UK           | Malaysia             | 2  |

|     |                      |    |
|-----|----------------------|----|
| UK  | Mexico               | 1  |
| UK  | New Zealand          | 4  |
| UK  | Norway               | 1  |
| UK  | Poland               | 3  |
| UK  | Portugal             | 5  |
| UK  | Qatar                | 1  |
| UK  | Singapore            | 1  |
| UK  | South africa         | 2  |
| UK  | Spain                | 6  |
| UK  | Sweden               | 7  |
| UK  | Switzerland          | 10 |
| UK  | Turkey               | 3  |
| UK  | United Arab Emirates | 1  |
| USA | Argentina            | 3  |
| USA | Australia            | 24 |
| USA | Austria              | 2  |
| USA | Bangladesh           | 1  |
| USA | Brazil               | 6  |
| USA | Canada               | 47 |
| USA | Chile                | 1  |
| USA | China                | 31 |
| USA | Colombia             | 1  |
| USA | Cyprus               | 2  |
| USA | Denmark              | 4  |
| USA | Finland              | 1  |
| USA | France               | 19 |
| USA | Germany              | 29 |
| USA | Greece               | 1  |
| USA | Hungary              | 1  |
| USA | India                | 4  |
| USA | Iran                 | 3  |
| USA | Ireland              | 2  |
| USA | Israel               | 18 |
| USA | Italy                | 23 |
| USA | Japan                | 8  |
| USA | Korea                | 5  |
| USA | Kuwait               | 1  |
| USA | Luxembourg           | 1  |
| USA | Netherlands          | 14 |
| USA | New Zealand          | 3  |
| USA | Norway               | 2  |
| USA | Peru                 | 3  |
| USA | Poland               | 7  |
| USA | Portugal             | 1  |
| USA | Qatar                | 3  |
| USA | Russia               | 2  |
| USA | Saudi Arabia         | 1  |
| USA | Singapore            | 3  |
| USA | South africa         | 2  |

|     |                      |    |
|-----|----------------------|----|
| USA | Spain                | 17 |
| USA | Sweden               | 16 |
| USA | Switzerland          | 16 |
| USA | Turkey               | 1  |
| USA | United Arab Emirates | 2  |
| USA | UK                   | 47 |

The table shows, for each country, the number and type of international collaborations based on the articles retrieved in the search.

**Table S2.** Most cited countries based on number of total citations

| Country              | Total Citations | Average Article Citations |
|----------------------|-----------------|---------------------------|
| USA                  | 23,434          | 27.029                    |
| UK                   | 5,284           | 22.581                    |
| Canada               | 3,877           | 35.898                    |
| Germany              | 3,335           | 18.736                    |
| France               | 1,352           | 15.906                    |
| Australia            | 1,273           | 14.303                    |
| Netherlands          | 1,176           | 16.11                     |
| China                | 1,032           | 7.818                     |
| Italy                | 991             | 12.235                    |
| Sweden               | 769             | 13.491                    |
| Japan                | 578             | 9.323                     |
| Spain                | 530             | 11.042                    |
| Switzerland          | 499             | 13.132                    |
| Denmark              | 278             | 18.533                    |
| Norway               | 250             | 35.714                    |
| Brazil               | 243             | 10.565                    |
| Austria              | 201             | 9.136                     |
| Korea                | 201             | 5.289                     |
| Israel               | 193             | 8.773                     |
| Poland               | 186             | 4.326                     |
| Belgium              | 184             | 6.345                     |
| Singapore            | 154             | 38.5                      |
| India                | 125             | 4.31                      |
| Ireland              | 116             | 9.667                     |
| Finland              | 110             | 8.462                     |
| Portugal             | 110             | 10                        |
| New Zealand          | 95              | 11.875                    |
| Argentina            | 89              | 17.8                      |
| Greece               | 77              | 12.833                    |
| United Arab Emirates | 47              | 9.4                       |
| Uruguay              | 47              | 15.667                    |
| Qatar                | 33              | 6.6                       |
| Russia               | 32              | 2.909                     |
| Turkey               | 23              | 2.556                     |
| Malaysia             | 18              | 9                         |
| Peru                 | 18              | 9                         |
| Iran                 | 17              | 1.889                     |
| Cyprus               | 14              | 7                         |
| Hungary              | 10              | 1.667                     |
| Slovakia             | 8               | 1                         |
| Pakistan             | 6               | 2                         |
| Bangladesh           | 5               | 2.5                       |
| Mexico               | 5               | 1                         |
| South africa         | 5               | 2.5                       |
| Chile                | 4               | 1                         |
| Lithuania            | 4               | 1.333                     |

|              |   |       |
|--------------|---|-------|
| Colombia     | 2 | 0.5   |
| Saudi Arabia | 2 | 1     |
| Thailand     | 2 | 1     |
| Croatia      | 1 | 0.5   |
| Romania      | 1 | 0.333 |
| Senegal      | 1 | 1     |
| Serbia       | 1 | 0.5   |
| Bulgaria     | 0 | 0     |
| Indonesia    | 0 | 0     |
| Lebanon      | 0 | 0     |
| Luxembourg   | 0 | 0     |
| Slovenia     | 0 | 0     |
| Sri Lanka    | 0 | 0     |

---

The table shows, for each country, the number of total citations and the average number of citations per article.



**Table S3.** Institutions with highest numbers of retrieved articles based on authors' affiliations

| <b>Affiliations</b>                    | <b>Articles</b> |
|----------------------------------------|-----------------|
| University of Toronto                  | 88              |
| Vanderbilt University                  | 83              |
| University of California Davis         | 81              |
| Harvard University                     | 63              |
| Northwestern University                | 61              |
| Kings College London                   | 59              |
| Duke University                        | 54              |
| University of California San Diego     | 53              |
| La Trobe University                    | 50              |
| University Iowa                        | 48              |
| University North Carolina              | 48              |
| Uppsala University                     | 48              |
| Emory University                       | 47              |
| Karolinska Institute                   | 47              |
| University of Pittsburgh               | 46              |
| Yale University                        | 45              |
| Macquarie University                   | 43              |
| University of Penn                     | 43              |
| University of Washington               | 43              |
| Stanford University                    | 42              |
| University of Wisconsin                | 42              |
| Boston University                      | 39              |
| University of Illinois                 | 37              |
| Johns Hopkins University               | 36              |
| University of California Los Angeles   | 36              |
| University Minnesota                   | 35              |
| Harvard Medical School                 | 34              |
| University of Utrecht                  | 34              |
| Peking University                      | 33              |
| University of Tübingen                 | 33              |
| Columbia University                    | 32              |
| University of Oxford                   | 31              |
| Curtin University                      | 30              |
| University of Cambridge                | 30              |
| McGill University                      | 29              |
| Tel Aviv University                    | 29              |
| University of Geneva                   | 29              |
| Penn State University                  | 28              |
| Indiana University                     | 27              |
| Queens University                      | 27              |
| University of Edinburgh                | 27              |
| Washington University                  | 27              |
| Maastricht University                  | 26              |
| Radboud University Nijmegen            | 26              |
| School of Medicine                     | 26              |
| University of California San Francisco | 26              |

|                                     |    |
|-------------------------------------|----|
| University of Kansas                | 26 |
| Brown University                    | 25 |
| Sun Yat-Sen University              | 25 |
| Newcastle University                | 24 |
| University of Barcelona             | 24 |
| University of British Columbia      | 24 |
| University of London                | 24 |
| University of Melbourne             | 23 |
| University of Texas Dallas          | 23 |
| Albert Einstein College of Medicine | 22 |
| Purdue University                   | 22 |
| University of Leipzig               | 22 |
| University of Rochester             | 22 |
| University of Siena                 | 22 |
| University of Lubeck                | 21 |
| University of Massachusetts         | 21 |
| Heidelberg University               | 20 |
| University of Maryland              | 20 |
| University of Bern                  | 19 |
| University of Fukui                 | 19 |
| University of Ghent                 | 19 |
| Baylor College of Medicine          | 18 |
| University of California Berkeley   | 18 |
| University of Groningen             | 18 |
| University of Kentucky              | 18 |
| University of Texas Austin          | 18 |
| University of Zurich                | 18 |
| Lund University                     | 17 |
| Massachusetts General Hospital      | 17 |
| Medical University Vienna           | 17 |
| Northeastern University             | 17 |
| Osaka University                    | 17 |
| University of Alberta               | 17 |
| University of Coimbra               | 17 |
| University of Munster               | 17 |
| University of Nottingham            | 17 |
| Beijing Normal University           | 16 |
| Jonkoping University                | 16 |
| Leiden University                   | 16 |
| Monash University                   | 16 |
| Rush University                     | 16 |
| University of Munich                | 16 |
| University of Western Ontario       | 16 |
| Ewha Womans University              | 15 |
| Florida State University            | 15 |
| University of Amsterdam             | 15 |
| University of Calgary               | 15 |
| University of Messina               | 15 |
| University of Milan                 | 15 |

|                                        |    |
|----------------------------------------|----|
| University of Oslo                     | 15 |
| University of Sheffield                | 15 |
| University of South Carolina           | 15 |
| University of Sydney                   | 15 |
| University of Tokyo                    | 15 |
| University of Western Australia        | 15 |
| Carnegie Mellon University             | 14 |
| Linköping University                   | 14 |
| Ohio University                        | 14 |
| Temple University                      | 14 |
| University of Alabama Birmingham       | 14 |
| University of Freiburg                 | 14 |
| University of Lancaster                | 14 |
| University of Reading                  | 14 |
| University of Southampton              | 14 |
| Virginia Commonwealth University       | 14 |
| Birkbeck University London             | 13 |
| Capital Medical University             | 13 |
| Chinese University Hong Kong           | 13 |
| City University London                 | 13 |
| Dept Neurosci                          | 13 |
| Drexel University                      | 13 |
| Gdańsk University of Technology        | 13 |
| Katholieke University Leuven           | 13 |
| University of Chicago                  | 13 |
| University of Gothenburg               | 13 |
| UT Health Science Center at Houston    | 13 |
| York University                        | 13 |
| Humboldt University                    | 12 |
| Institute of Neurology                 | 12 |
| Ohio State University                  | 12 |
| University of Complutense Madrid       | 12 |
| University of Copenhagen               | 12 |
| University of Houston                  | 12 |
| University of Sao Paulo                | 12 |
| Yale School of Medicine                | 12 |
| Anhui Medical University               | 11 |
| Bar Ilan University                    | 11 |
| Cardiff University                     | 11 |
| Center for Psychiatric Research        | 11 |
| Ludwig Maximilians University Munchen  | 11 |
| McLean Hospital                        | 11 |
| Moss Rehabilitation Research Institute | 11 |
| Paris                                  | 11 |
| Queens University of Belfast           | 11 |
| University of Cincinnati               | 11 |
| University of Connecticut              | 11 |
| University of Georgia                  | 11 |
| University of Manchester               | 11 |

|                                           |    |
|-------------------------------------------|----|
| West Virginia University                  | 11 |
| Aix Marseille University                  | 10 |
| Cornell University                        | 10 |
| Haskins Laboratories                      | 10 |
| Hong Kong Polytech University             | 10 |
| LuEsther T. Mertz Retinal Research Center | 10 |
| Medical University Hospital of Tübingen   | 10 |
| Seattle Childrens Research Institute      | 10 |
| Seoul Natl University                     | 10 |
| Simon Fraser University                   | 10 |
| University of Cape Town                   | 10 |
| University of Central Florida             | 10 |
| University of Chile                       | 10 |
| University of Colorado                    | 10 |
| University of Durham                      | 10 |
| University of Lille                       | 10 |
| University of Missouri                    | 10 |
| University Presbyterian Mackenzie         | 10 |

---

The table shows the number of articles per institution based on authors' affiliations. Institutions with at least 10 published articles are reported.

**Table S4.** List of sources in which at least 10 articles retrieved in the search were published

| Sources                                                   | Articles |
|-----------------------------------------------------------|----------|
| Journal of Autism and Developmental Disorders             | 104      |
| PLOS ONE                                                  | 65       |
| Autism Research                                           | 51       |
| Frontiers in Psychology                                   | 49       |
| Psychiatry Research                                       | 36       |
| Schizophrenia Research                                    | 35       |
| Research in Autism Spectrum Disorders                     | 32       |
| Biological Psychiatry                                     | 28       |
| Neuropsychologia                                          | 25       |
| Scientific Reports                                        | 25       |
| Investigative Ophthalmology & Visual Science              | 23       |
| Frontiers in Psychiatry                                   | 22       |
| Journal of Abnormal Psychology                            | 22       |
| American Journal of Psychiatry                            | 21       |
| Frontiers in Human Neuroscience                           | 21       |
| Molecular Autism                                          | 21       |
| Autism                                                    | 20       |
| Journal of Neurodevelopmental Disorders                   | 18       |
| Cognition                                                 | 17       |
| Journal of Speech Language and Hearing Research           | 17       |
| Behaviour Research and Therapy                            | 16       |
| Cognition & Emotion                                       | 16       |
| Experimental Brain Research                               | 16       |
| Research in Developmental Disabilities                    | 16       |
| Journal of Behavior Therapy and Experimental Psychiatry   | 15       |
| Archives of General Psychiatry                            | 14       |
| Cognitive Therapy and Research                            | 14       |
| Communication Sciences and Disorders-Csd                  | 13       |
| Journal of Affective Disorders                            | 13       |
| Retina-The Journal of Retinal and Vitreous Diseases       | 13       |
| Frontiers in Neuroscience                                 | 12       |
| Journal of Alzheimers Disease                             | 12       |
| Journal of Psychiatric Research                           | 12       |
| Developmental Psychology                                  | 11       |
| Developmental Science                                     | 11       |
| European Archives of Psychiatry and Clinical Neuroscience | 11       |
| Frontiers in Neurology                                    | 11       |
| International Journal of Eating Disorders                 | 11       |
| Journal of Anxiety Disorders                              | 11       |
| Journal of Child Psychology and Psychiatry                | 11       |
| Biological Psychology                                     | 10       |
| Infant Behavior & Development                             | 10       |
| Journal of Experimental Child Psychology                  | 10       |
| Journal of Neuroscience Methods                           | 10       |
| Language Cognition and Neuroscience                       | 10       |
| Quarterly Journal of Experimental Psychology              | 10       |

The table shows the number of articles per scientific journal.

**Table S5.** World collaboration network for articles investigating the use of eye tracking in autism spectrum disorders

| <b>From</b> | <b>To</b>   | <b>Frequency</b> |
|-------------|-------------|------------------|
| Argentina   | Luxembourg  | 1                |
| Australia   | Canada      | 2                |
| Australia   | Germany     | 1                |
| Australia   | Italy       | 1                |
| Australia   | Mexico      | 1                |
| Australia   | Qatar       | 1                |
| Australia   | Sweden      | 12               |
| Australia   | UK          | 6                |
| Austria     | New Zealand | 1                |
| Belgium     | France      | 2                |
| Belgium     | Switzerland | 1                |
| Belgium     | UK          | 1                |
| Belgium     | USA         | 6                |
| Canada      | Chile       | 1                |
| Canada      | Cyprus      | 1                |
| China       | Canada      | 7                |
| China       | Sweden      | 1                |
| France      | Canada      | 2                |
| France      | China       | 1                |
| France      | Cyprus      | 1                |
| France      | Germany     | 2                |
| France      | Israel      | 1                |
| France      | Italy       | 3                |
| France      | Netherlands | 1                |
| France      | Sweden      | 7                |
| France      | Switzerland | 12               |
| France      | UK          | 2                |
| Germany     | Austria     | 1                |
| Germany     | Canada      | 1                |
| Germany     | Cyprus      | 1                |
| Germany     | Greece      | 1                |
| Germany     | Netherlands | 2                |
| Germany     | Sweden      | 2                |
| India       | UK          | 2                |
| India       | USA         | 4                |
| Iran        | Canada      | 1                |
| Iran        | Sweden      | 1                |
| Italy       | Argentina   | 1                |
| Italy       | Canada      | 1                |
| Italy       | Cyprus      | 1                |
| Italy       | Germany     | 3                |
| Italy       | Greece      | 1                |
| Italy       | Luxembourg  | 1                |
| Italy       | Netherlands | 1                |
| Italy       | Norway      | 1                |

|             |                      |    |
|-------------|----------------------|----|
| Italy       | Spain                | 2  |
| Italy       | Sweden               | 2  |
| Japan       | Bangladesh           | 1  |
| Netherlands | Canada               | 1  |
| Netherlands | Cyprus               | 1  |
| Qatar       | United Arab Emirates | 1  |
| Spain       | Norway               | 1  |
| Spain       | Sweden               | 1  |
| Sweden      | Austria              | 1  |
| Sweden      | Canada               | 1  |
| Sweden      | Cyprus               | 1  |
| Sweden      | Netherlands          | 1  |
| Sweden      | New Zealand          | 1  |
| Sweden      | Norway               | 1  |
| Sweden      | Poland               | 1  |
| Switzerland | Brazil               | 1  |
| Switzerland | Canada               | 2  |
| Switzerland | Cyprus               | 1  |
| Switzerland | Germany              | 4  |
| Switzerland | Italy                | 1  |
| Switzerland | Malaysia             | 1  |
| Switzerland | Netherlands          | 1  |
| Switzerland | Sweden               | 4  |
| Switzerland | United Arab Emirates | 1  |
| Switzerland | UK                   | 3  |
| UK          | Canada               | 3  |
| UK          | Cyprus               | 1  |
| UK          | Finland              | 2  |
| UK          | Germany              | 4  |
| UK          | Greece               | 1  |
| UK          | Hungary              | 1  |
| UK          | Ireland              | 4  |
| UK          | Italy                | 7  |
| UK          | Japan                | 2  |
| UK          | Malaysia             | 2  |
| UK          | Mexico               | 1  |
| UK          | Netherlands          | 2  |
| UK          | New Zealand          | 1  |
| UK          | Poland               | 2  |
| UK          | Portugal             | 1  |
| UK          | Qatar                | 1  |
| UK          | Spain                | 1  |
| UK          | Sweden               | 4  |
| UK          | Turkey               | 3  |
| UK          | United Arab Emirates | 1  |
| USA         | Australia            | 12 |
| USA         | Canada               | 15 |
| USA         | China                | 17 |
| USA         | Cyprus               | 1  |

|     |                      |    |
|-----|----------------------|----|
| USA | France               | 9  |
| USA | Germany              | 5  |
| USA | Iran                 | 1  |
| USA | Israel               | 1  |
| USA | Italy                | 8  |
| USA | Japan                | 1  |
| USA | Korea                | 1  |
| USA | Netherlands          | 1  |
| USA | Norway               | 2  |
| USA | Peru                 | 3  |
| USA | Poland               | 1  |
| USA | Qatar                | 2  |
| USA | Singapore            | 1  |
| USA | Sweden               | 11 |
| USA | Switzerland          | 12 |
| USA | Turkey               | 1  |
| USA | United Arab Emirates | 2  |
| USA | UK                   | 15 |

---

The table shows, for each country, the number and type of international collaborations based on the articles retrieved in the search and related to autism.



**Table S6.** Most cited countries based on number of total citations for articles focused on autism spectrum disorders

| Country              | Total Citations | Average Article Citations |
|----------------------|-----------------|---------------------------|
| USA                  | 7,671           | 32.78                     |
| UK                   | 2,326           | 26.43                     |
| Sweden               | 507             | 22.04                     |
| Australia            | 487             | 15.71                     |
| China                | 438             | 8.42                      |
| France               | 395             | 12.74                     |
| Netherlands          | 384             | 34.91                     |
| Japan                | 324             | 18.00                     |
| Germany              | 288             | 15.16                     |
| Canada               | 237             | 19.75                     |
| Switzerland          | 196             | 13.07                     |
| Singapore            | 143             | 71.50                     |
| Italy                | 112             | 7.00                      |
| Denmark              | 100             | 33.33                     |
| India                | 100             | 7.69                      |
| Belgium              | 76              | 5.85                      |
| Ireland              | 50              | 16.67                     |
| Brazil               | 41              | 8.20                      |
| Qatar                | 27              | 6.75                      |
| Finland              | 25              | 5.00                      |
| Poland               | 20              | 4.00                      |
| Portugal             | 20              | 10.00                     |
| Spain                | 20              | 2.86                      |
| Malaysia             | 18              | 18.00                     |
| Peru                 | 18              | 9.00                      |
| Norway               | 13              | 6.50                      |
| Bangladesh           | 5               | 5.00                      |
| Hungary              | 4               | 2.00                      |
| Israel               | 3               | 1.00                      |
| Turkey               | 2               | 0.67                      |
| Iran                 | 1               | 0.33                      |
| Saudi Arabia         | 1               | 1.00                      |
| Austria              | 0               | 0.00                      |
| Bulgaria             | 0               | 0.00                      |
| Lithuania            | 0               | 0.00                      |
| Russia               | 0               | 0.00                      |
| United Arab Emirates | 0               | 0.00                      |

The table shows, for each country, the number of total citations and the average number of citations per article.

**Table S7.** Institutions with highest numbers of retrieved articles focused on autism spectrum disorders based on authors' affiliations

| <b>Affiliations</b>                  | <b>Articles</b> |
|--------------------------------------|-----------------|
| Vanderbilt University                | 54              |
| La Trobe University                  | 45              |
| Duke University                      | 44              |
| University of North Carolina         | 42              |
| University of Washington             | 35              |
| University of California Davis       | 31              |
| Yale University                      | 30              |
| Kings College London                 | 29              |
| Curtin University                    | 26              |
| Karolinska Institute                 | 24              |
| Uppsala University                   | 22              |
| Peking University                    | 21              |
| University of London                 | 20              |
| University of Wisconsin              | 20              |
| Emory University                     | 19              |
| Sun Yat-Sen University               | 18              |
| University of Cambridge              | 18              |
| University of Fukui                  | 16              |
| Harvard University                   | 15              |
| University California San Diego      | 15              |
| University of Nottingham             | 15              |
| University of Penn                   | 15              |
| University of Texas Dallas           | 15              |
| Boston University                    | 14              |
| Macquarie University                 | 14              |
| Stanford University                  | 14              |
| University of Geneva                 | 14              |
| Jonkoping University                 | 13              |
| University of California Los Angeles | 12              |
| University of Gothenburg             | 11              |
| Brown University                     | 10              |
| Harvard Medical School               | 10              |
| Katholieke University Leuven         | 10              |
| Linkoping University                 | 10              |
| McGill University                    | 10              |
| Penn State University                | 10              |
| Seattle Childrens Research Institute | 10              |
| University of Coimbra                | 10              |
| University of Kansas                 | 10              |
| University of Massachusetts          | 10              |
| University of Utrecht                | 10              |
| Yale School of Medicine              | 10              |

The table shows the number of articles per institution based on authors' affiliations. Institutions with at least 10 published articles are reported.
